1 **Title**

2 Short-interval fires and vegetation change in southern California

3

4 **Short running title**

5 Short-interval fires and vegetation change

6

7 **Authors**

8 Stephanie M. Lucero<sup>1</sup>, Nathan C. Emery<sup>2</sup>, Carla M. D'Antonio<sup>1,3</sup>

9 <sup>1</sup>Department of Ecology, Evolution, and Marine Biology, University of California, Santa  
10 Barbara, Santa Barbara, CA, USA.

11 <sup>2</sup> Department of Plant Biology, Michigan State University, East Lansing, MI, USA.

12 <sup>3</sup>Environmental Studies Program, University of California, Santa Barbara, Santa Barbara, CA,  
13 USA.

14

15 **Correspondence**

16 Stephanie M. Lucero, Department of Ecology, Evolution, and Marine Biology, University of  
17 California, Santa Barbara, Santa Barbara, CA, USA.

18 Email: [sama@ucsb.edu](mailto:sama@ucsb.edu)

19

20 **Funding**

21 The California Energy Commission (500-10-045, CMD) and the University of California, Santa  
22 Barbara provided funding.

23

## 24 **Abstract**

### 25 Questions

26           In southern California, shortened fire return intervals may contribute to a decrease in  
27 native chaparral shrub presence and an increase in non-native annual grass presence. To test the  
28 hypothesis that short-fire return intervals promote a loss in shrub cover, we examined the  
29 contribution of single short-interval fires and abiotic conditions on the change of shrub cover  
30 within Ventura and Los Angeles counties. Through evaluating pre- and post-fire historical aerial  
31 images, we answered the following questions, 1) How has vegetation type cover changed after  
32 repeat fires? and 2) What landscape variables contribute the most to the observed change?

33

### 34 Location

35 Ventura County and Los Angeles County, California, USA.

36

### 37 Methods

38 We assessed the impact of a single short-interval fire by comparing vegetation recovery in  
39 adjacent once- and twice-burned fire burn polygons (long- and short-interval respectively). Pixel  
40 plots were examined within each polygon and vegetation cover was classified to vegetation type.  
41 We determined the best predictor of vegetation type cover with a linear mixed effects model  
42 comparison using Akaike Information Criterion.

43

### 44 Results

45 Pre-fire and post-fire community type cover was highly correlated. Burn interval was the best  
46 predictor of tree cover change (lower cover in twice-burned pixel plots). Aspect was the best  
47 predictor of sage scrub cover change (greater cover on north-facing aspects). Years since fire

48 was the best predictor of chaparral cover change (positive correlation) and sage scrub cover  
49 change (negative correlation). Conversion of chaparral to sage scrub cover was more likely to  
50 occur than conversion of chaparral to annual grass cover.

51

## 52 Conclusions

53 Our study did not find extensive evidence of a decrease in chaparral shrub cover due to a single  
54 short-interval fire. Instead, post-fire cover was highly correlated with pre-fire cover. Chaparral  
55 recovery, however, was dynamic suggesting that stand recovery may be strongly influenced by  
56 local scale conditions and processes.

57

## 58 **Keywords**

59 southern California, chaparral, short-interval fire, vegetation change, historical aerial  
60 photographs, georectification, linear mixed-effects model, type conversion, sage scrub, grass

61

62

63

64

65

66

67

68

69

70

71

## 72 **Introduction**

73 Fire-adapted ecosystems around the world are experiencing significant changes to the historical  
74 fire regime due to human influences (Piñol et al., 1998, Gillett et al., 2004, Syphard et al., 2007b,  
75 Nowacki and Abrams, 2008). The interval time between fire events (fire return interval), is one  
76 of the most direct way humans can alter a fire regime. Fire suppression has lengthened the  
77 interval time between fires in the northern Rockies (Barrett and Arno, 1982), in western  
78 Washington (Everett et al., 2000), and in the Sierra Nevada mountains (McKelvey et al., 1996)  
79 leading to with fire-adapted tree species being replaced by fire-sensitive, shade-tolerant species.  
80 A shorter fire interval can also put fire-adapted ecosystems at risk. In southern California, a  
81 shorter fire return interval is considered one of the leading drivers of native shrubs being  
82 replaced by non-native annual grasses (Keeley, 2000, Haidinger and Keeley, 1993, Zedler et al.,  
83 1983).

84 In southern California chaparral ecosystems, the historical fire return interval ranges from  
85 30-90 years (Keeley et al., 2004, Van de Water and Safford, 2011) and in some locations may be  
86 as long as 150 years (Syphard et al., 2006). In this Mediterranean-type climate region, fires are  
87 typically crown fires (Hanes, 1971) occurring in the summer and fall (Beyers and Wakeman,  
88 2000). Post fire, these stands generally return to pre-fire canopy cover within the first decade  
89 (Hope et al., 2007, Peterson and Stow, 2003) and to pre-fire stand structure within the second  
90 decade following fire (Hanes, 1971, Schlesinger and Gill, 1978).

91 In contrast, the current fire return interval can be much shorter due to an expansion of the  
92 wildland-urban-interface (Syphard et al., 2007a) and increased year-round anthropogenic  
93 ignitions caused by increasing human populations (Keeley and Fotheringham, 2001). Climate  
94 change is also expected to shorten mean fire return intervals as temperatures in southern  
95 California become warmer and precipitation more variable, thus increasing the risk of ignition

96 (Krawchuk and Moritz, 2012, Polade et al., 2017). Furthermore, with the introduction of non-  
97 native annual grasses, chaparral communities could be driven toward a new successional  
98 trajectory leading to the extirpation of native shrub species and the expansion of non-native  
99 annual grasses (Brooks et al., 2004, Keeley and Brennan, 2012, D'Antonio and Vitousek, 1992).

100 A shortened fire interval has been recognized as one of the main causes of chaparral  
101 conversion to non-native annual grasses (Keeley, 2000, Syphard et al., 2019b). This is because  
102 many chaparral species require five-to-ten years to reach reproductive maturity (Zammit and  
103 Zedler, 1993) and at least 15 years to establish a robust seedbank (Syphard et al., 2018b, Park et  
104 al., 2018, Keeley, 2000). This is especially true of obligate seeding species, which are not fire  
105 resistant and germinate from seed following fire (Keeley, 1991). Extirpation of obligate seeding  
106 species and an increase in non-native species have been observed in the field when a second fire  
107 occurred in short succession (Zedler et al., 1983, Haidinger and Keeley, 1993, Keeley and  
108 Brennan, 2012, Jacobsen et al., 2004).

109 A single short-interval fire, however, does not always lead to chaparral conversion.  
110 Previous work with remotely sensed data suggest that water availability (Park et al., 2018,  
111 Syphard et al., 2019a), elevation (Meng et al., 2014), and mean annual temperature (Storey et al.,  
112 2021) explain more variation among chaparral stand recovery (although also see Syphard et al.  
113 (2019b)). These studies utilized imagery with 30-m spatial resolution and/or datasets with a 30-m  
114 scale.

115 There exists a research gap between in-person observations following a single fire event  
116 and landscape-scale observations across multiple fire events. The goal of this study was to  
117 address this limitation by using high resolution (1-meter) historical aerial imagery to observe  
118 detailed vegetation regrowth across the landscape and across multiple historical- and short-  
119 interval fire events.

120 In this study, we measured the difference in vegetation type cover following once- or  
121 twice-burned fire polygons (long- and short-interval fires, respectively) using historical aerial  
122 photographs ranging from 1956 and 2003 across two counties where, if chaparral conversion  
123 were occurring, we should be able to detect chaparral loss and decline. Through evaluation of  
124 pre- and post-fire images, we asked 1) How has vegetation type cover (i.e., chaparral, sage scrub,  
125 grass, tree) changed after repeat fires? and 2) What landscape variables contribute to the  
126 observed changes in vegetation cover?

127

## 128 **Methods**

### 129 *Mapping the occurrence of short-interval fires*

130 Fire history data (1879-2009) were acquired from the Fire and Resources Assessment Program  
131 (FRAP) database (CALFIRE, [www.fire.ca.gov](http://www.fire.ca.gov)), reporting fires  $\geq 4$  hectares. The FRAP database  
132 was used because we required spatially explicit polygons for our analysis (although see Syphard  
133 and Keeley (2016) for the limitations of using the FRAP database). The shapefile was clipped in  
134 ArcMap (ArcGIS 10.1) to select for wildfires that fell within the study area of Ventura and Los  
135 Angeles counties and then processed to create an Interval Wildfire Occurrence map (Figure 1),  
136 each polygon having its own unique wildfire history based on original wildfire perimeters.

137 The attribute table of the Interval Wildfire Occurrence map was exported to MS Excel  
138 (Microsoft 2011) and new metrics such as “Number of Fires” and “Minimum Fire Interval” were  
139 calculated (Appendix 1). Wildfire perimeters were filtered to eliminate single wildfires that were  
140 reported by multiple agencies, for example if a polygon had multiple “Fire Alarm Dates” in the  
141 same year (Jacobsen et al., 2004). The modified data table was finally joined back to the merged  
142 shapefile in ArcMap.

143

144 *Selection of twelve paired sites in Ventura and Los Angeles Counties*

145 Ventura and Los Angeles Counties are ideal for determining the effects of a short-interval  
146 wildfire because the region is highly vulnerable to fire during the dry months (typically July-  
147 October) when Santa Ana wind conditions promote fast spreading wildfires (Hughes and Hall,  
148 2010). In addition, the number of short-interval wildfires is predicted to increase as the  
149 population of southern California continues to grow (Keeley and Fotheringham, 2001, Myers and  
150 Pitkin, 2013).

151 Study sites were selected from the Interval Wildfire Occurrence map (Figure 1). We  
152 defined a “short-interval fire” as a fire return interval of five or fewer years. To quantify the  
153 effects of a single short-interval fire on vegetation, we selected polygons that experienced two  
154 wildfires within a five-year period that had an adjacent polygon that experienced only one  
155 wildfire within the same five-year period. All polygons had to be at least  $\geq 0.5$  km<sup>2</sup> to allow for  
156 sufficient subsampling and analysis. Polygons that experienced a short-interval fire were  
157 considered “twice-burned” polygons (e.g., burned in 1962 and 1967) and adjacent polygons that  
158 only experienced the latter fire (e.g., 1967) were considered “once-burned” polygons. Selecting  
159 paired polygons that burned in the second fire, allowed for the polygons to experience the same  
160 number of post-fire recovery years. Long-interval polygons had, on average,  $26.6 \pm 5.2$  (standard  
161 error mean) years of regrowth since the last wildfire and two of the twelve polygons (Site 3 and  
162 Site 9) had no prior record of wildfire since the early 1900s. For two sites (Site 4 and Site 6),  
163 long-interval polygons burned in the first wildfire year (instead of the second wildfire) and were  
164 analyzed in images  $\geq 19$  years post-fire. This exception was allowed assuming any difference in  
165 vegetation cover between long-interval and short-interval polygons would be negligible after  $\geq 19$   
166 years of regrowth (Zammit and Zedler, 1993).

167           In addition to burn history, sites were selected to represent vegetation variation within the  
168 two counties and along a moisture gradient determined by their distance from the coast. Sites  
169 closer to the coast are generally more mesic and sites farther inland are generally more arid  
170 (Franklin, 1998). Water availability influences chaparral and sage scrub community composition  
171 and extent (Mooney and Parsons, 1973, Poole and Miller, 1981). Sites were selected to represent  
172 the vegetation communities within Los Padres National Forest in Ventura County and within the  
173 Angeles National Forest and the Santa Monica Mountain National Recreation Area in Los  
174 Angeles County.

175

#### 176 *Selecting aerial photographs*

177 Historical aerial photographs (HAPs) were acquired from the Map and Imagery Laboratory  
178 (MIL) at the University of California, Santa Barbara in 2011 to 2014  
179 ([www.library.ucsb.edu/mil](http://www.library.ucsb.edu/mil)). HAPs were chosen between 1952 and 2009 for corresponding  
180 wildfires spanning 1956 to 2003. Pre-fire HAPs were selected as close to before the first wildfire  
181 as possible to record initial vegetation cover and post-fire HAPs were selected  $\geq 6$  years  
182 following the second wildfire to capture maximal vegetation cover without encountering a third  
183 wildfire (Appendix 1). Vegetation communities were assumed to return to pre-fire canopy cover  
184 within six years following wildfire (Muller et al., 1968, Schlesinger and Gill, 1978). Seasonality  
185 of images was not controlled for under the assumption that mature communities appear  
186 distinguishable year-round (i.e., chaparral appears darker with a closed canopy year-round; grass  
187 appears lighter and has no visible canopy structure year-round). Final HAP selection was based  
188 on photograph availability and adherence to fire criteria.

189

#### 190 *Georectifying aerial photographs*



191 To compare pre- and post-fire vegetation cover on a pixel-by-pixel basis, all HAPs were  
192 georectified to the same base image. Grayscale, 2009, one-meter spatial resolution, digital  
193 orthophoto quarter quads (DOQQ) of Ventura or Los Angeles County, collected by the United  
194 States Geological Survey, were used as the base image. Temporally stable objects such as large  
195 shrubs or trees, rock outcrops, and crests and troughs of the mountainous landscape were used as  
196 registration points (RPs). Dirt roads and permanent structures were also used, although these  
197 more permanent features were rare in the HAPs due to the remoteness of the polygons. Because  
198 the terrain of the HAPs was mountainous and highly variable, RPs were placed at a high density  
199 to increase warping accuracy. Each HAP was then warped using triangulation and pixels were  
200 resampled to the nearest neighbor, creating a georectified HAP with one-meter spatial resolution.

201 Georectified HAPs (gHAPs) were then mosaicked to minimize edge distortion and  
202 increase spatial accuracy for vegetation analysis. Mosaicked gHAPs covered the entire long-  
203 interval and short-interval polygon of a site under pre-fire and post-fire conditions. Only two  
204 sites (Sites 2 and 6) were not georectified across their entire long-interval polygon due to a lack  
205 of available HAPs and/or their extensive size and instead an equivalent or greater area to the  
206 short-interval polygon was georectified.

207 Mosaicked gHAPs were validated for their spatial accuracy by identifying 40-100 RPs  
208 corresponding to the 2009 DOQQ base map. Validation RPs had a final root mean square error  
209 of ten pixels (i.e., ten meters) or less.

210

211 *Plot selection on north and south aspects within long- and short-interval polygons*

212 Aspect is a large influencer of vegetation type cover (Hanes, 1971) with south facing aspects  
213 receiving more solar radiation than north facing aspects. Random points were generated within  
214 each site's pre-fire gHAP and approximately eight points in the long-interval polygon and eight

215 points in the short-interval polygon were selected for vegetation analysis. At each point, a 50 x  
216 50 pixel plot (50 x 50 m) was established. Pixel plots (hereafter “plots”) were distributed  
217 between north and south facing aspects (north: 0.0° to 67.5° or 292.5° to 360°; south: 112.5° to  
218 247.5°) to account for differences in solar irradiance (northern aspects receive less solar  
219 irradiance than southern aspects). Plots were shifted if needed to ensure they did not overlap a  
220 mountain ridge or valley and to fit entirely on one aspect. Aspect was verified with 30-meter  
221 USGS Digital Elevation Model (DEM) data and/or visually with Google Earth (Google Earth  
222 Pro 7.3.0.3832). All pre-fire plots were replicated in the post-fire mosaicked gHAP to capture  
223 vegetation regrowth at the same location.

224 In total, 198 plots were analyzed with 99 plots in long-interval polygons and 99 plots in  
225 short-interval polygons. One hundred and four plots had northern aspects and 94 plots had  
226 southern aspects. Plots were considered independent after including site as a covariate in plot  
227 level analysis and found no significant influence on plot level results.

228 Prescribed burns included in the FRAP database were reviewed and only two of the 198  
229 plots overlapped with a prescribed burn. These two plots were removed from the analysis.

230

### 231 *Quantifying vegetation type cover within plots*

232 To quantify vegetation type cover at each plot, the “dot grid” method was used (Floyd  
233 and Anderson, 1982, Dublin, 1991). A ten-by-ten grid (100 points) was overlaid on each plot  
234 with a spacing of five pixels (five meters) between each point. Vegetation cover was classified to  
235 vegetation type: chaparral, grass, sage scrub or tree. All grass cover was assumed to be non-  
236 native dominated based on the 1930’s Wieslander Maps and the 2001 USDA California  
237 Vegetation map. For classification consistency, all sites were examined twice to account for  
238 initial training and improvement in classification over time.

239 To improve classification accuracy, solar zenith was considered to account for shadows  
240 and Google Earth was referenced for vegetation type cover and seasonal changes (available  
241 years: 1990-2015). The authors traveled to six of the twelve sites to confirm that site cover  
242 approximated vegetation type cover observed in the HAPs (e.g., a matrix of chaparral, sage  
243 scrub, and grass in the HAPs were a matrix of vegetation in the field). However, verification of  
244 the HAPs was infeasible due to many of the images being decades old.

245 Percent cover (%) was quantified by tallying the number of points classified within each  
246 vegetation type (100 points = 100% cover). Pre-fire vegetation cover was subtracted from post-  
247 fire vegetation cover to quantify the amount of vegetation type change within each plot.

248

#### 249 *Datasets for abiotic variables*

250 Aspect was calculated from USGS digital elevation models (DEMs) with a 30 x 30 meter  
251 horizontal resolution and a one-meter vertical resolution. Distance from the coast was calculated  
252 in ArcMap by determining the centroid point of each polygon and measuring the shortest direct  
253 distance to the coastline (Appendix 1).

254 Moisture availability following fire, influences seedling survival and thus eventual  
255 vegetation type cover (Pratt et al., 2014, Venturas et al., 2016). It was calculated from PRISM  
256 (<http://www.prism.oregonstate.edu/explorer/>) averaging the annual precipitation during the first  
257 five years of regrowth following the latter wildfire.

258

#### 259 *Statistical analysis*

260 Statistical analysis was conducted using RStudio (RStudio, Inc. version 0.98.1103) and R version  
261 3.3.2 (<http://www.rstudio.com/>) and were either run at the plot level (e.g., 99 once-burned and 99

262 twice-burned plots) or at the polygon level (e.g., 12 once-burned polygons and 12 twice-burned  
263 polygons). Polygon values were calculated as the mean of their plot values.

264 As post-fire vegetation type cover at the plot level was highly correlated with pre-fire  
265 vegetation type cover (Figure 2), the residuals of a linear regression for pre- and post-fire  
266 vegetation types were derived to account for pre-existing plant communities. A linear mixed-  
267 effects model of plot data (N = 198) was run for each vegetation type with site as a random effect  
268 to reduce the effects of spatial autocorrelation. The models to predict the residuals were: burn  
269 interval, aspect, years after fire (when post-fire HAPs were taken), distance to coast, and the  
270 five-year average rainfall post-fire. In total, five models were run for each vegetation type. The  
271 Akaike Information Criterion (AIC) values of each model were compared within a vegetation  
272 type. The model(s) with the lowest AIC value were further investigated for each vegetation type.  
273 If the best model predictor was categorical, then an ANOVA was performed to determine  
274 statistical significance and if the model predictor was continuous, a linear regression was  
275 performed to determine significance.

276

## 277 **Results**

### 278 *Trends in vegetation type cover comparing pre-fire and post-fire conditions*

279 For each vegetation cover type, post-fire conditions were highly correlated with pre-fire  
280 conditions (N = 198) (Figure 2). Linear regressions were significant for chaparral percent cover  
281 ( $P < 0.001$ ,  $r^2 = 0.93$ ), sage scrub percent cover ( $P < 0.001$ ,  $r^2 = 0.91$ ), grass percent cover ( $P <$   
282  $0.001$ ,  $r^2 = 0.93$ ), and tree percent cover ( $P < 0.001$ ,  $r^2 = 0.94$ ).

283

### 284 *Linear mixed-effects model*

285 When analyzing chaparral vegetation type residuals, the models with the lowest AIC values  
286 included aspect and years since fire (Table 1). An ANOVA of aspect yielded a trend towards a  
287 difference between north and south facing aspects ( $P = 0.083$ ,  $F = 3.05$ ) with south-facing  
288 aspects showing greater decreases in cover than north-facing aspects (Figure 3, top right).  
289 Change in chaparral cover was positively correlated with longer recovery time post-fire (Figure  
290 3, top left,  $P < 0.001$ ,  $t = 3.507$ ). For sage scrub residuals, the models with the lowest AIC were  
291 also aspect and years after fire. Plots on north-facing aspects had greater positive change in sage  
292 scrub percent cover than south-facing slopes (Figure 3, middle right,  $P = 0.034$ ,  $F = 4.567$ ).  
293 Change in sage scrub cover was negatively correlated with years after fire (Figure 3, middle left,  
294  $P = 0.005$ ,  $t = -2.823$ ). The lowest AIC value for grass residuals was years after fire, however the  
295 difference in AIC value among models was very slight. A linear regression of the change in  
296 percent grass and years after fire was not significant (Figure 3, bottom left,  $P = 0.185$ ,  $t = -$   
297  $1.332$ ). For tree residuals, the best model was burn interval. Once-burned plots had more  
298 negative change in tree cover than short-interval plots (Figure 4, ANOVA,  $P = 0.030$ ,  $F = 4.769$ ).  
299 This pattern was still significant when the outlier site (Site 11, Plot 7:  $-39.97$ ) was removed  
300 (ANOVA,  $P = 0.048$ ,  $F = 3.97$ ).

301

### 302 *Transition matrix*

303 The majority of pixels showed no change in cover (Figure 5). The majority pixels located in  
304 once-burned plots returned to their pre-fire cover (chaparral: 86.3%; sage scrub: 80.4%; grass:  
305 76.3%; tree: 74.0%). Pixels in twice-burned plots also often returned to their pre-fire cover  
306 (chaparral: 87.1%; sage scrub: 78.4%; grass: 70.0%; tree: 65.7%).

307 The transition direction and the proportion of pixels that changed in cover were similar  
308 between once- and twice-burned locations. Chaparral pixels were more likely to convert to sage

309 scrub than to grass (once-burned: 8.4% and 1.3% respectively; twice-burned: 10.5% and 0.7%  
310 respectively). Sage scrub pixels were more likely to convert to chaparral than to grass (once  
311 burned: 10.8% and 5.2% respectively; twice-burned: 14.0% and 5.5% respectively). Grass pixels  
312 that converted were most likely to convert to sage scrub cover (once-burned: 17.0%; twice-  
313 burned: 23.8%).

314

## 315 **Discussion**

316 The results of this study found that a single short-interval fire, as quantified in twice-  
317 burned plots, did not lead to significant vegetation type change of chaparral, sage scrub or grass  
318 cover at the landscape scale. A short-interval fire was only a significant predictor of reduced  
319 vegetation cover for plots dominated by trees (Table 1). Instead, overall vegetation recovery  
320 trends were driven by the pre-existing cover (i.e., post-fire cover was significantly correlated  
321 with pre-fire cover) (Figure 2).

322 There were, however, a large number of plots that either increased or decreased in cover  
323 about the mean. Suggesting there is greater heterogeneity at the individual plot level than there is  
324 at the landscape level. Ninety-eight out of 198 chaparral plots and 91 out of 198 sage scrub plots  
325 showed an increase or decrease in woody cover following fire. This heterogeneity in canopy  
326 regrowth is consistent with previous findings (Syphard et al., 2018a, Park et al., 2018, Storey et  
327 al., 2021).

328 While we set out to observe if there was evidence of chaparral conversion to grass  
329 following a single short-interval fire, we found there was greater conversion from chaparral to  
330 sage scrub (10.5%) than chaparral to grass (0.6%). In comparison, sage scrub was more likely to  
331 convert to grass (5.5%). These interactions may be influenced by these communities' physical  
332 distribution. Sage scrub communities are typically found below chaparral at lower elevations,

333 which tend to be hotter and drier, and adjacent to urban areas, which tend to be dominated by  
334 annual grasses. Similar results were found by Syphard et al. (2018a, 2018b, 2006) and Meng et  
335 al. (2014).

336 Aspect was a significant driver of sage scrub cover (Figure 3, middle right) and a strong  
337 driver of chaparral cover (Figure 3, top right) with cover increasing on north-facing aspects and  
338 decreasing on south-facing aspects. This result was unexpected as north-facing aspects tend to  
339 have more mesic conditions and receive less solar radiation, conditions where chaparral typically  
340 outcompete sage scrub (Syphard et al., 2006). Miller et al. (1983) showed similar dry down  
341 periods (0-2 weeks) between north- and south-facing aspects, indicating soil moisture on  
342 opposing aspects may not be as different as originally expected.

343 There was strong evidence that chaparral cover increased on north-facing aspects and  
344 decreased on south-facing aspects (Figure 3, top right), which is consistent with previous  
345 research (Hanes, 1971, Keeley and Keeley, 1981) and other studies that found metrics of soil  
346 aridity to be positively correlated with chaparral loss (Syphard et al., 2019a) and grass presence  
347 (Park et al., 2018).

348 Another explanation as to why no significant difference was detected between north- and  
349 south-facing aspects could be due to the expansion of *Malosma laurina*, a tenacious facultative  
350 resprouter, on south-facing aspects, which can outcompete other species when water resources  
351 are limited (Thomas and Davis, 1989). Because *M. laurina* can reach similar heights and canopy  
352 densities as mixed chaparral stands, locations dominated by *M. laurina* would have been  
353 classified as “chaparral” in the HAPs.

354 While we were readily able to differentiate between vegetation cover types (e.g., grass, sage  
355 scrub, chaparral, tree), we were not able to identify vegetation to species, which meant we were  
356 unable to detect if there was a change in community composition or a change in the presence of

357 obligate seeding, obligate resprouting, or facultative resprouting shrub species. These  
358 reproductive strategies are predicted to respond differentially to increased fire frequency  
359 (Keeley, 1991, Syphard et al., 2006, Franklin et al., 2004) and distribution can vary by water  
360 availability (Mooney and Parsons, 1973, Poole and Miller, 1981, Franklin, 1998, Meentemeyer  
361 and Moody, 2002).

362 In addition, no significant difference in chaparral cover on north- or south-facing aspects  
363 could be due to the method of data collection. Since values from the dot-grid method spanned 0-  
364 100%, plots with close to 100% chaparral cover pre-fire had little room to increase in chaparral  
365 cover post-fire. Within plots that had 100% chaparral cover pre-fire, a decrease in cover or “no  
366 change” was the only possible outcome. Indeed, average pre-fire chaparral cover on north-facing  
367 (more mesic) aspects was  $72.19 \pm 3.78\%$  compared to only  $26.33 \pm 3.49\%$  on south-facing (more  
368 arid) aspects. North-facing aspects had more chaparral cover to lose at the outset.

369 Calculating the relative change in vegetation cover was explored, however it inflated non-  
370 biologically important results (e.g., 1 pixel post-fire / 2 pixels pre-fire = decrease of 50%) and  
371 hid larger community changes (e.g., 60 pixels post-fire / 100 pixels pre-fire = decrease of 40%).  
372 For this reason, all changes in cover were calculated as their absolute value (e.g., 1 pixel post-fire  
373 - 2 pixels pre-fire = decrease by 1).

374 Chaparral and sage scrub cover showed strong yet opposing trends in succession  
375 following fire. Chaparral cover increased significantly with additional years after fire whereas  
376 sage scrub cover strongly declined with additional years after fire (Figure 3, left). This supports  
377 previous studies that suggest sage scrub can be successional to chaparral given enough time  
378 without fire (McPherson and Muller, 1967, Gray, 1983). This transition in canopy cover is  
379 consistent with the assumption that chaparral stands require five to thirty years to recover after  
380 wildfire (Hanes, 1971, Hope et al., 2007, Schlesinger and Gill, 1978) and subshrubs, common in



381 sage scrub communities, decline as chaparral shrubs mature around them (Syphard et al., 2006).  
382 Thus, it could be possible that with enough fire-free years, chaparral cover could expand via the  
383 establishment of chaparral species within sage scrub stands.

384 Number of years post-fire and vegetation succession may also explain some of the  
385 vegetation change detected in Syphard et al. (2018a). Some locations observed to convert from  
386 shrub to grass cover may have been dominated by or included herbaceous cover in the process of  
387 recovering following fire and may not represent the mature community. The Day fire (2006),  
388 Zaca fire (2007), and La Brea fire (2009) occurred within seven years prior to the 2013 Landfire  
389 vegetation map, so it is within the window of expected recovery that some of these locations  
390 were still recovering and may eventually return to shrub cover absent of short-interval fires.

391 We hypothesized sites closer to the coast would be more mesic and sites farther from the  
392 coast would be more arid, leading to less vegetation conversion near the coast and more  
393 conversion inland. We did not, however, find distance to the coast to be a significant factor. This  
394 could be due to vegetation trends being more strongly correlated with moisture gradients driven  
395 by elevation than by distance from the coast. Indeed, Meng et al. (2014) and Syphard et al.  
396 (2019b) found elevation to be a strong driver of vegetation change with more chaparral  
397 conversion occurring at lower elevations. Analysis by Storey et al. (2019) included a more  
398 extensive range of chaparral stands in southern California and found vegetation change was  
399 greatest in the eastern portion of their study region and at higher elevations and was a result of  
400 drought and fire interactions.

401 The five-year average rainfall following the latter fire was also found to not be a  
402 significant driver of vegetation type change, which is in line with other studies (Storey et al.,  
403 2020, Meng et al., 2014), although see Storey et al. (2021). Storey et al. (2020) found climatic  
404 water deficit to be a stronger predictor of chaparral recovery compared to total precipitation and

405 water conditions preceding fire were generally more predictive of recovery than conditions  
406 following fire. Finer temporal scale patterns of rainfall (e.g., light rainfall over a month vs. a one-  
407 day downpour, early winter vs. late winter) will also likely be important to consider in the  
408 seasons leading up to fire and the first year following fire. This will especially be true of  
409 locations that are already water limited (e.g.,  $< 500 \text{ mm y}^{-1}$ ).

410 While almost all polygons included in this study experienced additional fires before and  
411 after the years of analysis, multiple short-interval fires were not included in this analysis nor was  
412 the entire fire history (1878-2009) of a location. Storey et al. (2021) included additional fire  
413 history by comparing locations in southern California that burned once, twice, or three times  
414 within 25 years. They found no difference in shrub recovery between stands that burned once or  
415 twice but did find a decrease in shrub recovery when locations burned three times within 25  
416 years. Investigating sites that experienced multiple short-interval fires will continue to be highly  
417 valuable as will investigating the impact of variability in years between fires (Zedler, 1995) on  
418 vegetation change.

419 Another factor that might have contributed to our results is the time frame of analysis  
420 (i.e., 1956-2003). Resilient shrub species may have already been selected for in locations that  
421 experienced multiple fires. Thus, any vegetation change that would have occurred due to a short-  
422 interval fire may have already occurred, prior to when imagery was first available.

423 While this study did not find a consistent increase in grass cover following a single short-  
424 interval fire, non-native annual grasses still pose a risk to native plant communities. When non-  
425 native annual grasses senesce they create highly ignitable, continuous fuel across the landscape  
426 that can carry fire into chaparral stands that otherwise would not have ignited (Keeley, 2000). An  
427 expanding wildland-urban-interface (Syphard et al., 2007b) and climate change (Krawchuk and  
428 Moritz, 2012) are also expected to create additional risks for southern California's wildlands.

429

## 430 **Conclusion**

431           The aim of this study was to identify how vegetation type cover changed in response to a  
432 single short-interval fire (defined as two fires within five years) and how environmental variables  
433 contributed to vegetation type change across the landscape. We did not find extensive evidence  
434 that short-interval fires promoted a landscape-scale loss of shrublands. Instead, we found  
435 chaparral cover only slightly declined in twice-burned plots. Tree cover was the only vegetation  
436 type to significantly decline following a single-short interval fire. Our data are consistent with  
437 the hypothesis that chaparral conversion to other vegetation types occurs slowly and is likely  
438 influenced by its abiotic environment. Aspect was the best predictor of differences in sage scrub  
439 cover while the number of years post-fire was the best predictor of chaparral and sage scrub  
440 stand regrowth. Post-fire and pre-fire cover, overall, were highly correlated for all vegetation  
441 cover types, although variation at the pixel plot level was apparent, suggesting that vegetation  
442 change occurring at the local scale may be influenced primarily by local scale processes.

443 Therefore, caution is advised when managing fire-prone vegetation types as these landscapes can  
444 be highly heterogeneous and outcomes at one location may not reflect landscape level patterns.

445

446

## 447 **Acknowledgements**

448 We are grateful to E. Burley, S. Suresh, C. Allred, T. Madden, and M. Plummer for their  
449 assistance processing aerial images; to S. Peterson for guidance in ENVI and ArcGIS; and to P.  
450 Dennison, M. Moritz, and R. Oono for their advice, guidance, and feedback on earlier versions  
451 this manuscript.

452

453

454

## Citations

455

456 BARRETT, S. W. & ARNO, S. F. 1982. Indian Fires as an Ecological Influence in the Northern  
457 Rockies. *Journal of Forestry*, 80, 647-651.

458 BEYERS, J. L. & WAKEMAN, C. D. 2000. Season of burn effects in southern California

459 chaparral. *Second interface between ecology and land development in California. Open-*

460 *File Report 00-62. Sacramento, CA: US Department of the Interior, Geological Survey,*

461 *45-55.*

462 BROOKS, M. L., D'ANTONIO, C. M., RICHARDSON, D. M., GRACE, J. B., KEELEY, J. E.,

463 DITOMASO, J. M., HOBBS, R. J., PELLANT, M. & PYKE, D. 2004. Effects of

464 invasive alien plants on fire regimes. *Bioscience*, 54, 677-688.

465 DUBLIN, H. T. 1991. Dynamics of the Serengeti-Mara woodlands: an historical perspective.

466 *Forest & Conservation History*, 35, 169-178.

467 D'ANTONIO, C. & VITOUSEK, P. M. 1992. Biological invasions by exotic grasses, the

468 grass/fire cycle, and global change. *Annual Review of Ecology and Systematics*, 23, 63-

469 87.

470 EVERETT, R. L., SCHELLHAAS, R., KEENUM, D., SPURBECK, D. & OHLSON, P. 2000.

471 Fire history in the ponderosa pine/Douglas-fir forests on the east slope of the Washington

472 Cascades. *Forest Ecology and Management*, 129, 207-225.

473 FLOYD, D. A. & ANDERSON, J. E. 1982. A new point interception frame for estimating cover

474 of vegetation. *Vegetatio*, 50, 185-186.

475 FRANKLIN, J. 1998. Predicting the distribution of shrub species in southern California from

476 climate and terrain-derived variables. *Journal of Vegetation Science*, 9, 733-748.

- 477 FRANKLIN, J., COULTER, C. L. & REY, S. J. 2004. Change over 70 years in a southern  
478 California chaparral community related to fire history. *Journal of Vegetation Science*, 15,  
479 701-710.
- 480 GILLETT, N., WEAVER, A., ZWIERS, F. & FLANNIGAN, M. 2004. Detecting the effect of  
481 climate change on Canadian forest fires. *Geophysical Research Letters*, 31.
- 482 GRAY, J. T. 1983. Competition for light and a dynamic boundary between chaparral and coastal  
483 sage scrub. *Madrono*, 43-49.
- 484 HAIDINGER, T. L. & KEELEY, J. E. 1993. Role of high fire frequency in destruction of mixed  
485 chaparral. *Madrono*, 141-147.
- 486 HANES, T. L. 1971. Succession after fire in chaparral of southern California. *Ecological*  
487 *Monographs*, 41, 27-&.
- 488 HOPE, A., TAGUE, C. & CLARK, R. 2007. Characterizing post-fire vegetation recovery of  
489 California chaparral using TM/ETM+ time-series data. *International Journal of Remote*  
490 *Sensing*, 28, 1339-1354.
- 491 HUGHES, M. & HALL, A. 2010. Local and synoptic mechanisms causing Southern California's  
492 Santa Ana winds. *Climate Dynamics*, 34, 847-857.
- 493 JACOBSEN, A., DAVIS, S. & FABRITIUS, S. 2004. Fire frequency impacts non-sprouting  
494 chaparral shrubs in the Santa Monica Mountains of southern California. *Ecology,*  
495 *conservation and management of mediterranean climate ecosystems*. Millpress,  
496 *Rotterdam, Netherlands*.
- 497 KEELEY, J. E. 1991. Seed-germination and life-history syndromes in the California chaparral.  
498 *Botanical Review*, 57, 81-116.

- 499 KEELEY, J. E. Fire and invasive species in Mediterranean-climate ecosystems of California.  
500       Proceedings of the invasive species workshop: the role of fire in the control and spread of  
501       invasive species. Fire conference, 2000. 81-94.
- 502 KEELEY, J. E. & BRENNAN, T. J. 2012. Fire-driven alien invasion in a fire-adapted  
503       ecosystem. *Oecologia*, 169, 1043-1052.
- 504 KEELEY, J. E., FOTHERINGHAM, C. & MORITZ, M. A. 2004. Lessons from the october  
505       2003. Wildfires in Southern California. *Journal of Forestry*, 102, 26-31.
- 506 KEELEY, J. E. & FOTHERINGHAM, C. J. 2001. Historic fire regime in Southern California  
507       shrublands. *Conservation Biology*, 15, 1536-1548.
- 508 KEELEY, J. E. & KEELEY, S. C. 1981. Post-fire regeneration of southern California chaparral.  
509       *American Journal of Botany*, 68, 524-530.
- 510 KRAWCHUK, M. & MORITZ, M. 2012. *Fire and climate change in California: changes in the*  
511       *distribution and frequency of fire in climates of the future and recent past (1911-2099)*,  
512       California Energy Commission.
- 513 MCKELVEY, K. S., SKINNER, C. N., CHANG, C.-R., ERMAN, D. C., HUSARI, S. J.,  
514       PARSONS, D. J., VAN WAGTENDONK, J. W. & WEATHERSPOON, C. P. An  
515       overview of fire in the Sierra Nevada. Pages 1033-1040 in: Sierra Nevada Ecosystem  
516       Project, Final Report to Congress, Vol. II, Assessments and Scientific Basis for  
517       Management Options. Davis, CA: University of California, Centers for Water and  
518       Wildland Resources. Report No. 37., 1996.
- 519 MCPHERSON, J. K. & MULLER, C. H. 1967. Light competition between *Ceanothus* and *Salvia*  
520       shrubs. *Bulletin of the Torrey Botanical Club*, 41-55.

- 521 MEENTEMEYER, R. K. & MOODY, A. 2002. Distribution of plant life history types in  
522 California chaparral: the role of topographically-determined drought severity. *Journal of*  
523 *Vegetation Science*, 13, 67-78.
- 524 MENG, R., DENNISON, P. E., D'ANTONIO, C. M. & MORITZ, M. A. 2014. Remote Sensing  
525 Analysis of Vegetation Recovery following Short-Interval Fires in Southern California  
526 Shrublands. *Plos One*, 9.
- 527 MILLER, P. & POOLE, D. 1983. The influence of annual precipitation, topography, and  
528 vegetative cover on soil moisture and summer drought in southern California. *Oecologia*,  
529 56, 385-391.
- 530 MOONEY, H. A. & PARSONS, D. J. 1973. Structure and function of the California chaparral—  
531 an example from San Dimas. *Mediterranean type ecosystems*. Springer.
- 532 MULLER, C. H., HANAWALT, R. B. & MCPHERSON, J. K. 1968. Allelopathic control of  
533 herb growth in the fire cycle of California chaparral. *Bulletin of the Torrey Botanical*  
534 *Club*, 225-231.
- 535 MYERS, D. & PITKIN, J. 2013. The Generational Future of Los Angeles: Projections to 2030  
536 and Comparisons to Recent Decades. *California Demographic Futures*. USC Sol Price  
537 *School for Public Policy*.
- 538 NOWACKI, G. J. & ABRAMS, M. D. 2008. The demise of fire and “mesophication” of forests  
539 in the eastern United States. *BioScience*, 58, 123-138.
- 540 PARK, I. W., HOOPER, J., FLEGAL, J. M. & JENERETTE, G. D. 2018. Impacts of climate,  
541 disturbance and topography on distribution of herbaceous cover in Southern California  
542 chaparral: Insights from a remote-sensing method. *Diversity and Distributions*, 24, 497-  
543 508.

- 544 PETERSON, S. & STOW, D. 2003. Using multiple image endmember spectral mixture analysis  
545 to study chaparral regrowth in southern California. *International Journal of Remote*  
546 *Sensing*, 24, 4481-4504.
- 547 PIÑOL, J., TERRADAS, J. & LLORET, F. 1998. Climate warming, wildfire hazard, and  
548 wildfire occurrence in coastal eastern Spain. *Climatic change*, 38, 345-357.
- 549 POLADE, S. D., GERSHUNOV, A., CAYAN, D. R., DETTINGER, M. D. & PIERCE, D. W.  
550 2017. Precipitation in a warming world: Assessing projected hydro-climate changes in  
551 California and other Mediterranean climate regions. *Scientific reports*, 7, 1-10.
- 552 POOLE, D. & MILLER, P. 1981. The distribution of plant water stress and vegetation  
553 characteristics in southern California chaparral. *American Midland Naturalist*, 32-43.
- 554 PRATT, R. B., JACOBSEN, A. L., RAMIREZ, A. R., HELMS, A. M., TRAUGH, C. A.,  
555 TOBIN, M. F., HEFFNER, M. S. & DAVIS, S. D. 2014. Mortality of resprouting  
556 chaparral shrubs after a fire and during a record drought: physiological mechanisms and  
557 demographic consequences. *Global change biology*, 20, 893-907.
- 558 SCHLESINGER, W. H. & GILL, D. S. 1978. Demographic studies of the chaparral shrub,  
559 *Ceanothus megacarpus*, in the Santa Ynez Mountains, California. *Ecology*, 59, 1256-  
560 1263.
- 561 STOREY, E. A., STOW, D. A., O'LEARY, J. F., DAVIS, F. W. & ROBERTS, D. A. 2021.  
562 Does short-interval fire inhibit postfire recovery of chaparral across southern California?  
563 *Science of The Total Environment*, 751, 142271.
- 564 STOREY, E. A., STOW, D. A., ROBERTS, D. A., O'LEARY, J. F. & DAVIS, F. W. 2019.  
565 Evaluating Drought Impact on Postfire Recovery of Chaparral Across Southern  
566 California. *Ecosystems*.



- 567 STOREY, E. A., STOW, D. A., ROBERTS, D. A., O'LEARY, J. F. & DAVIS, F. W. 2020.  
568 Evaluating Drought Impact on Postfire Recovery of Chaparral Across Southern  
569 California. *Ecosystems*.
- 570 SYPHARD, A. D., BRENNAN, T. J. & KEELEY, J. E. 2018a. Chaparral landscape conversion  
571 in southern California. *Valuing Chaparral*. Springer.
- 572 SYPHARD, A. D., BRENNAN, T. J. & KEELEY, J. E. 2019a. Drivers of chaparral type  
573 conversion to herbaceous vegetation in coastal Southern California. *Diversity and*  
574 *Distributions*, 25, 90-101.
- 575 SYPHARD, A. D., BRENNAN, T. J. & KEELEY, J. E. 2019b. Extent and drivers of vegetation  
576 type conversion in Southern California chaparral. *Ecosphere*, 10, e02796.
- 577 SYPHARD, A. D., CLARKE, K. C. & FRANKLIN, J. 2007a. Simulating fire frequency and  
578 urban growth in southern California coastal shrublands, USA. *Landscape Ecology*, 22,  
579 431-445.
- 580 SYPHARD, A. D., FRANKLIN, J. & KEELEY, J. E. 2006. Simulating the effects of frequent  
581 fire on southern California coastal shrublands. *Ecological Applications*, 16, 1744-1756.
- 582 SYPHARD, A. D. & KEELEY, J. E. 2016. Historical reconstructions of California wildfires  
583 vary by data source. *International Journal of Wildland Fire*, 25, 1221-1227.
- 584 SYPHARD, A. D., RADELOFF, V. C., KEELEY, J. E., HAWBAKER, T. J., CLAYTON, M.  
585 K., STEWART, S. I. & HAMMER, R. B. 2007b. Human influence on California fire  
586 regimes. *Ecological Applications*, 17, 1388-1402.
- 587 SYPHARD, A. D., SHEEHAN, T., RUSTIGIAN-ROMSOS, H. & FERSCHWEILER, K.  
588 2018b. Mapping future fire probability under climate change: Does vegetation matter?  
589 *PLoS One*, 13, e0201680.

- 590 THOMAS, C. & DAVIS, S. 1989. Recovery patterns of three chaparral shrub species after  
591 wildfire. *Oecologia*, 80, 309-320.
- 592 VAN DE WATER, K. M. & SAFFORD, H. D. 2011. A summary of fire frequency estimates for  
593 California vegetation before Euro-American settlement. *Fire Ecology*, 7, 26-58.
- 594 VENTURAS, M. D., MACKINNON, E. D., DARIO, H. L., JACOBSEN, A. L., PRATT, R. B.  
595 & DAVIS, S. D. 2016. Chaparral shrub hydraulic traits, size, and life history types relate  
596 to species mortality during California's historic drought of 2014. *PloS one*, 11, e0159145.
- 597 ZAMMIT, C. A. & ZEDLER, P. H. 1993. Size Structure and Seed Production in Even-Aged  
598 Populations of *Ceanothus Greggii* in Mixed Chaparral. *Journal of Ecology*, 81, 499-511.
- 599 ZEDLER, P. H. 1995. Fire frequency in southern California shrublands: biological effects and  
600 management options. *Brushfires in California wildlands: ecology and resource*  
601 *management. International Association of Wildland Fire, Fairfield, Washington, USA,*  
602 101-112.
- 603 ZEDLER, P. H., GAUTIER, C. R. & MCMASTER, G. S. 1983. Vegetation change in response  
604 to extreme events: the effect of a short interval between fires in California chaparral and  
605 coastal scrub. *Ecology*, 64, 809-818.
- 606
- 607
- 608
- 609
- 610
- 611
- 612

613 **Table 1** Linear mixed-effects model results for all vegetation type covers at the plot level (N =  
614 198). Each model had site as a random effect and was analyzed using the residuals of pre/post-  
615 fire vegetation percent cover.

616

| Vegetation Class | Model AIC     |           |                  |                   |                            |
|------------------|---------------|-----------|------------------|-------------------|----------------------------|
|                  | Burn Interval | Aspect    | Years After Fire | Distance to Coast | Five-year Average Rainfall |
| chaparral        | 1519.907      | 1515.694* | 1514.127*        | 1519.806          | 1519.095                   |
| sage scrub       | 1525.744      | 1522.241* | 1522.682*        | 1527.828          | 1527.542                   |
| grass            | 1296.388      | 1296.534  | 1295.17*         | 1296.466          | 1296.417                   |
| tree             | 1160.116*     | 1164.776  | 1164.47          | 1164.837          | 1164.873                   |

617 \* indicates best model(s)

618

619

620

621

622

623

624

625

626

627

628

629

630

631 **Figure legends**

632

633 **Figure 1** Minimum fire intervals as reported by CalFire ([frap.fire.ca.gov](http://frap.fire.ca.gov)) for Ventura and Los  
634 Angeles counties from 1878 to 2009. Twelve sites where one polygon burned twice within five  
635 years (twice-burned, black) and an adjacent polygon burned once within the same five-year  
636 period (once-burned, white).

637

638 **Figure 2** Linear regressions with confidence intervals of pre-fire and post-fire percent cover for  
639 all four vegetation type covers. Each point represents a once-burned (gray) or twice-burned  
640 (black) plot.

641

642 **Figure 3** Linear regressions with confidence intervals of time since last fire with residuals (left  
643 side) for chaparral ( $P < 0.001^{***}$ ,  $r^2 = 0.05$ ), sage shrub ( $P = 0.005^{**}$ ,  $r^2 = 0.03$ ), and grass ( $P =$   
644  $0.16$ ,  $r^2 = 0.005$ ) cover. Distribution of the residuals (right side) of chaparral (ANOVA,  $P =$   
645  $0.114$ ), sage scrub (ANOVA,  $P = 0.046^*$ ), and grass (ANOVA,  $P = 0.886$ ) cover by aspect.

646

647 **Figure 4** Distribution of residuals for tree cover (ANOVA,  $P = 0.03^*$ ) by burn interval. When  
648 the outlier of tree percent lost in the twice-burned burn interval is removed, the relationship is  
649 still significant (ANOVA,  $P$  value =  $0.048^*$ ).

650

651 **Figure 5** Transitions for all pixels showing pre-fire (left axis) and pos-tfire (right axis) cover  
652 within (a) once-burned plots and (b) twice-burned plots. Gray bands depict the proportion of  
653 pixels that remained or transitioned to another cover type.

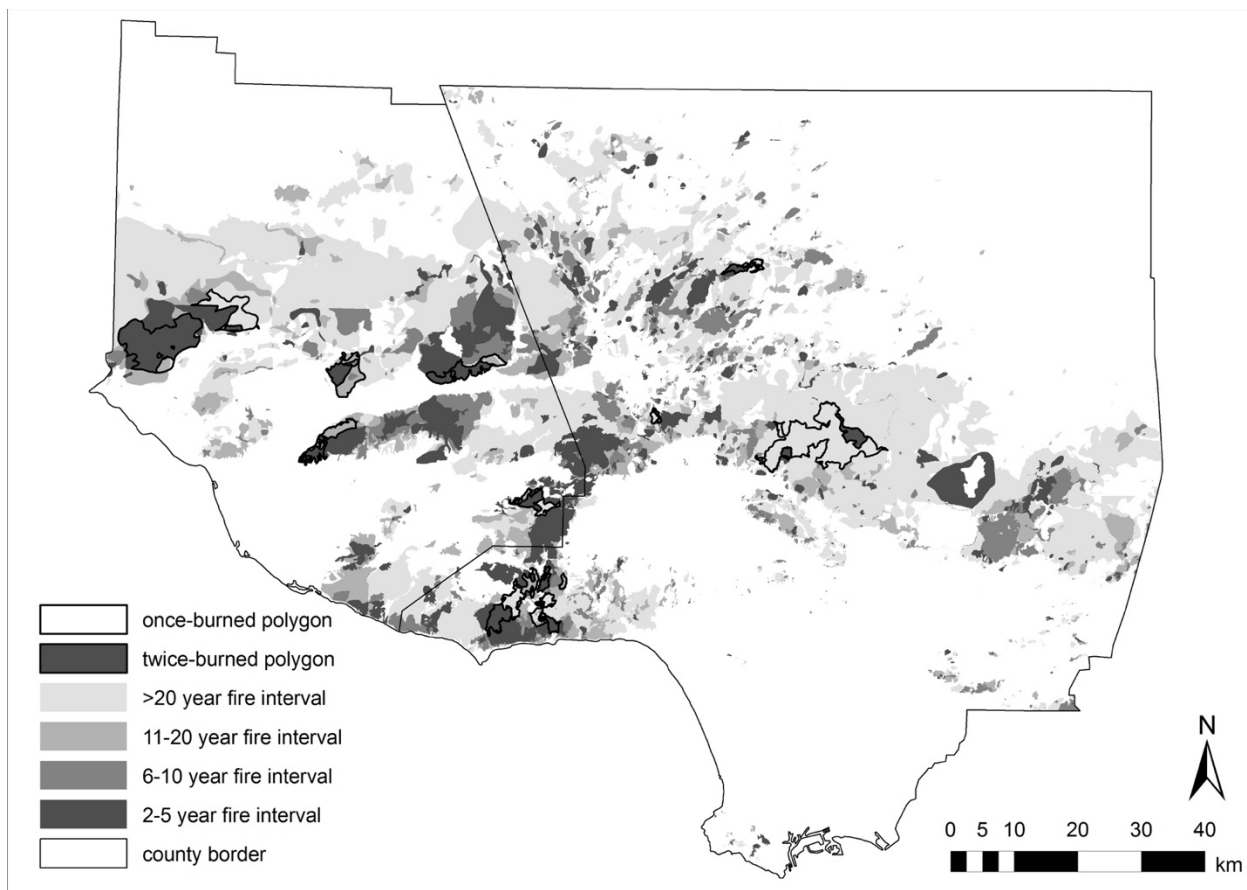

**Figure 1** Minimum fire intervals as reported by CalFire ([frap.fire.ca.gov](http://frap.fire.ca.gov)) for Ventura and Los Angeles counties from 1878 to 2009. Twelve sites where one polygon burned twice within five years (twice-burned, black) and an adjacent polygon burned once within the same five-year period (once-burned, white).

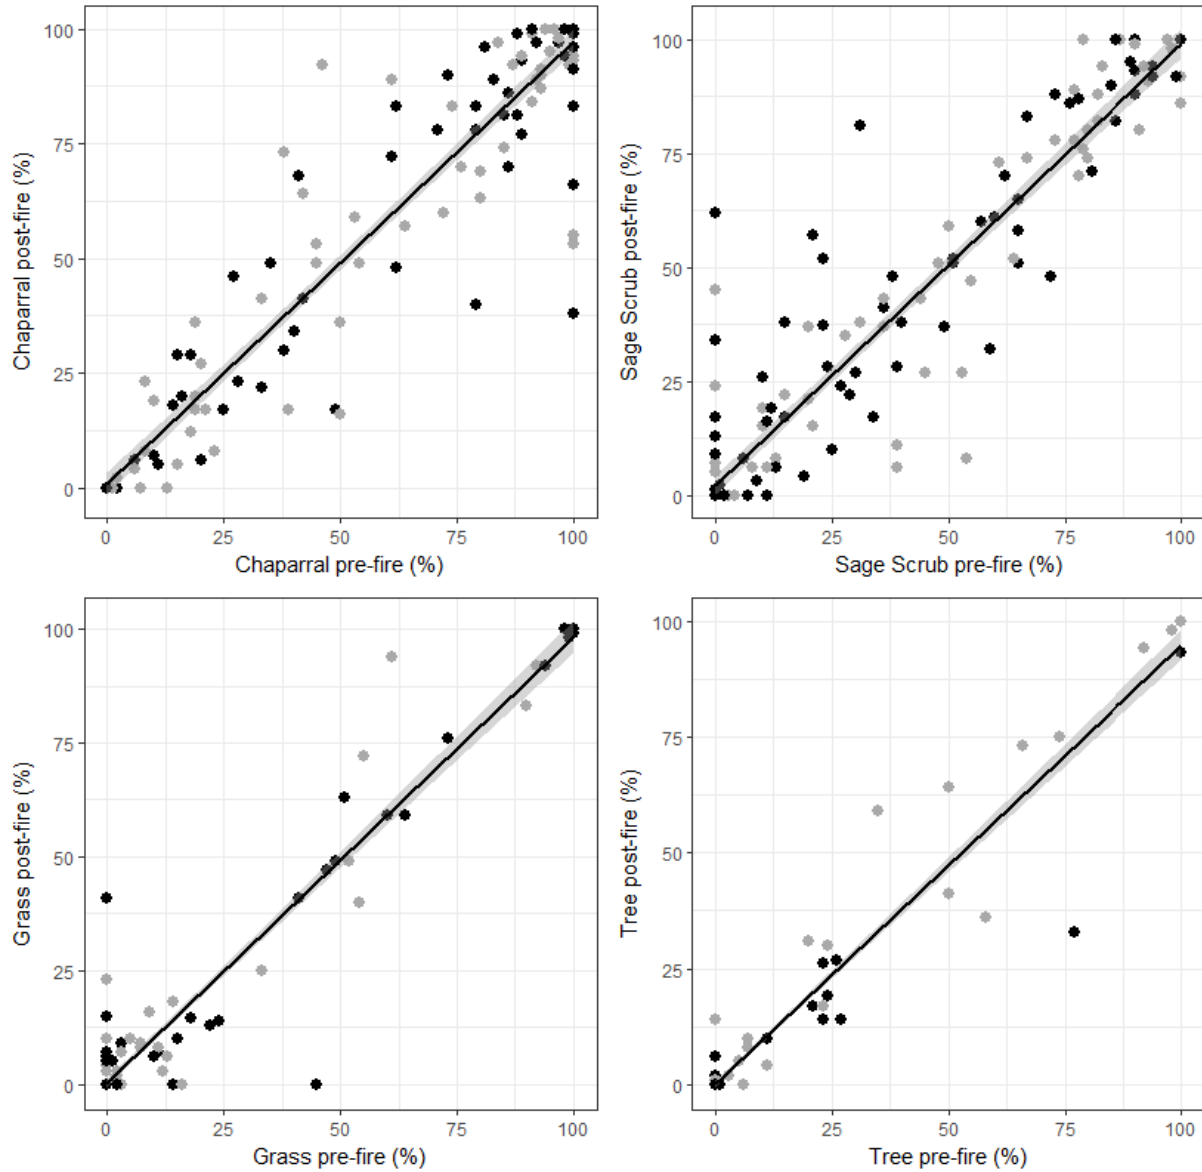

666

667 **Figure 2** Linear regressions with confidence intervals of pre-fire and post-fire percent cover for

668 all four vegetation type covers. Each point represents a once-burned (gray) or twice-burned

669 (black) plot.

670

671

672

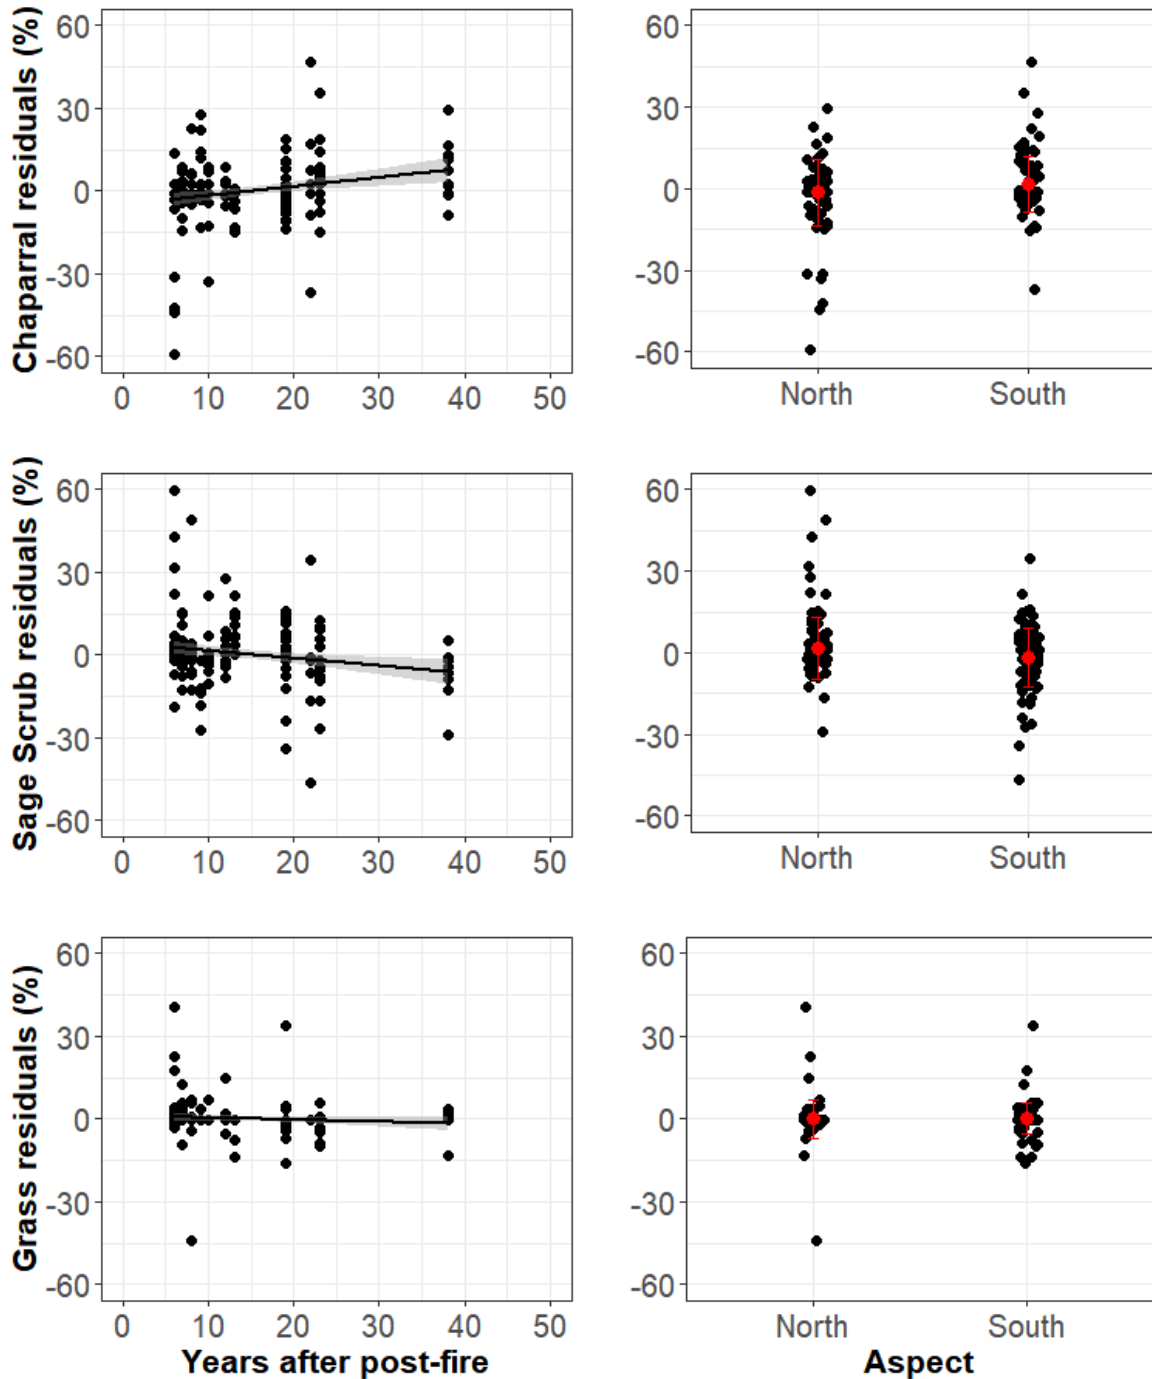

673

674 **Figure 3** Linear regressions with confidence intervals of time since last fire with residuals (left  
675 side) for chaparral ( $P < 0.001^{***}$ ,  $r^2 = 0.05$ ), sage shrub ( $P = 0.005^{**}$ ,  $r^2 = 0.03$ ), and grass ( $P =$   
676  $0.16$ ,  $r^2 = 0.005$ ) cover. Distribution of the residuals (right side) of chaparral (ANOVA,  $P =$   
677  $0.114$ ), sage scrub (ANOVA,  $P = 0.046^*$ ), and grass (ANOVA,  $P = 0.886$ ) cover by aspect.

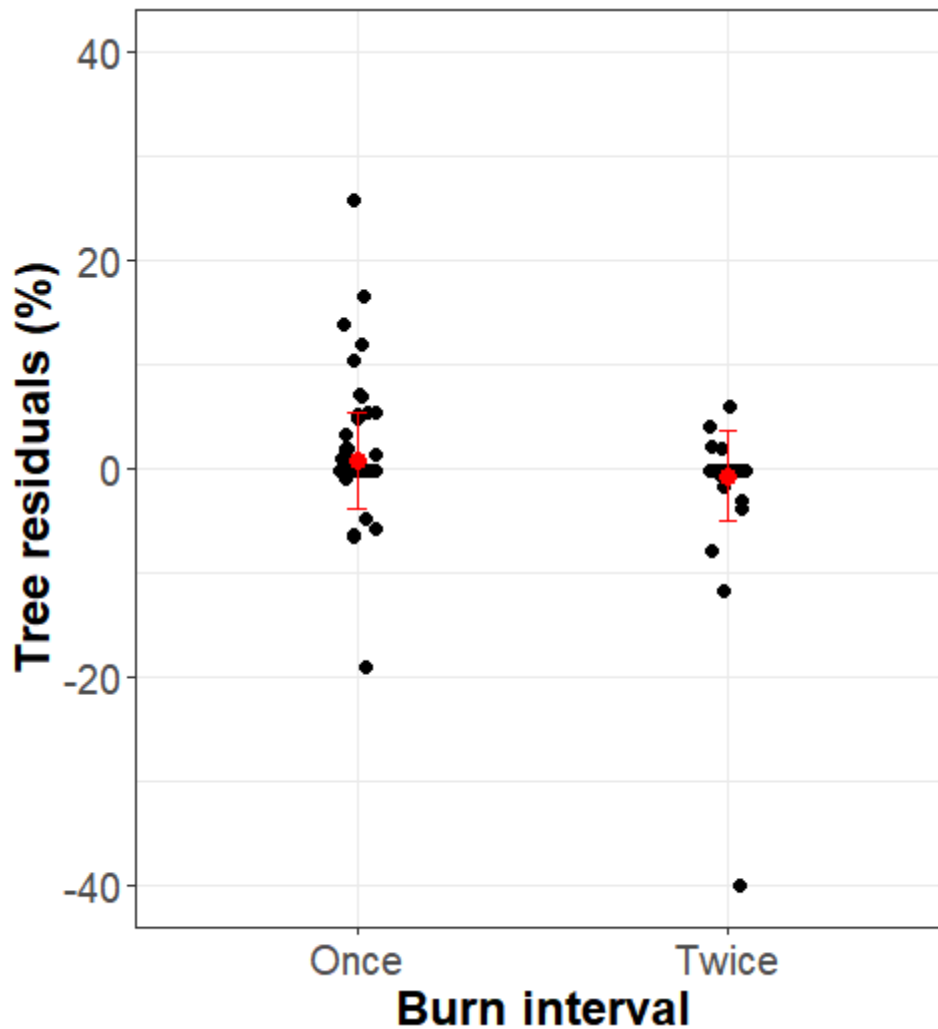

678

679 **Figure 4** Distribution of residuals for tree cover (ANOVA,  $P = 0.03^*$ ) by burn interval. When

680 the outlier of tree percent lost in the twice-burned burn interval is removed, the relationship is

681 still significant (ANOVA,  $P$  value = 0.048\*).

682



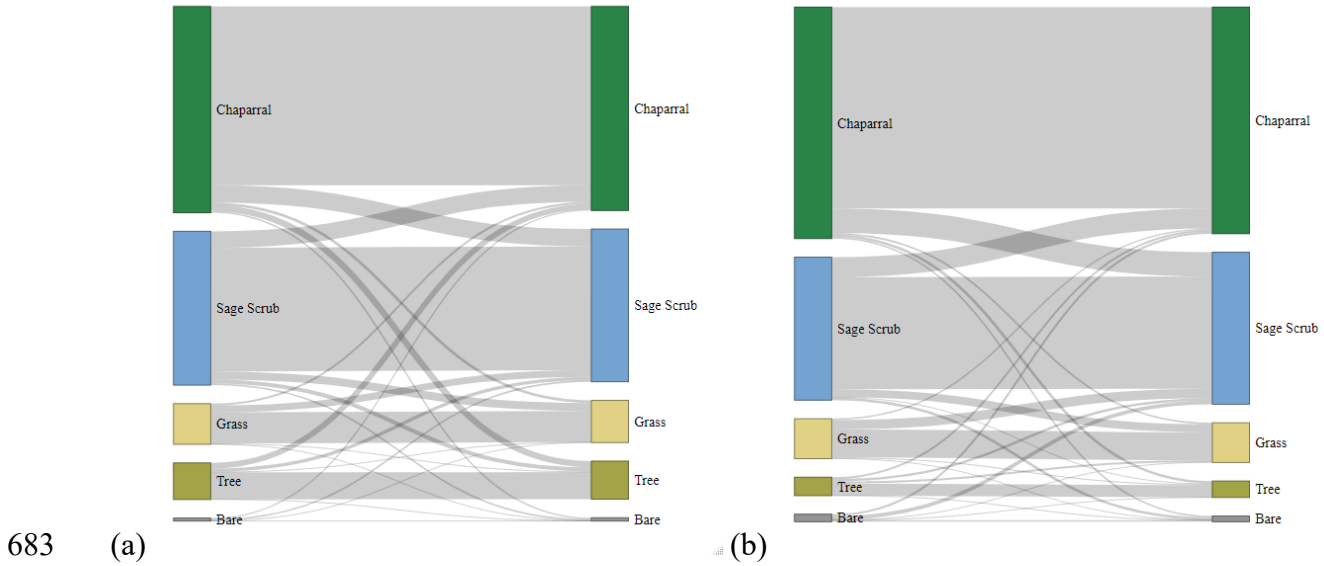

683

(a)

(b)

684

685 **Figure 5** Transitions for all pixels showing pre-fire (left axis) and post-fire (right axis) cover

686 within (a) once-burned plots and (b) twice-burned plots. Gray bands depict the proportion of

687 pixels that remained or transitioned to another cover type.

688

689
